# Supplementary material for: Gold nanostars as a colloidal substrate for in-solution SERS measurements using a handheld Raman spectrometer
Source: Royal Society of Chemistry journal article supplement (doi:10.1039/c9an02439e), 2020-01-01
Supplement: c9an02439e1.pdf [file c9an02439e1.pdf]

## Supplementary Information

### Gold nanostars as a colloidal substrate for in-solution SERS measurements using a handheld Raman spectrometer

Ahmed Y. F. Mahmoud†, Casey J. Rusin† and Mark T. McDermott\*

Department of Chemistry, University of Alberta, Edmonton, Alberta T6G 2G2

†Both authors contributed equally to this manuscript

\*Author to whom correspondence should be addressed, [mark.mcdermott@ualberta.ca](mailto:mark.mcdermott@ualberta.ca)

#### Table of Contents:

|                                                                                                                                                                              |      |
|------------------------------------------------------------------------------------------------------------------------------------------------------------------------------|------|
| <b>Figure SI1.</b> UV-Vis spectrum of citrate capped gold nanoparticles (30 nm).                                                                                             | SI2  |
| <b>Figure SI2.</b> Histograms and TEM images of AuNS using HEPES (A and B) and EPPS (C and D) at R 100. The white boxes represent the area where FFT analysis was performed. | SI3  |
| <b>Figure SI3.</b> Solution Raman spectra of water, EPPS and HEPES buffer.                                                                                                   | SI4  |
| <b>Figure SI4.</b> Raman spectrum of solid methimazole.                                                                                                                      | SI5  |
| <b>Table SI1.</b> Major bands assignments listed for the SERS spectrum of 4-mercaptobenzonitrile on AuNS.                                                                    | SI6  |
| <b>Table SI2.</b> Major bands assignments listed for the SERS spectrum of thiabendazole on AuNS.                                                                             | SI7  |
| <b>Table SI3.</b> Major bands assignments listed for the SERS spectrum of methimazole on AuNS.                                                                               | SI8  |
| <b>Table SI4.</b> Major bands assignments listed for the SERS spectrum of malachite green on AuNS.                                                                           | SI9  |
| <b>Table SI5.</b> Major bands assignments listed for the SERS spectrum of ciprofloxacin on AuNS.                                                                             | SI10 |
| <b>Analyte descriptions</b>                                                                                                                                                  | SI11 |
| <b>References</b>                                                                                                                                                            | SI13 |

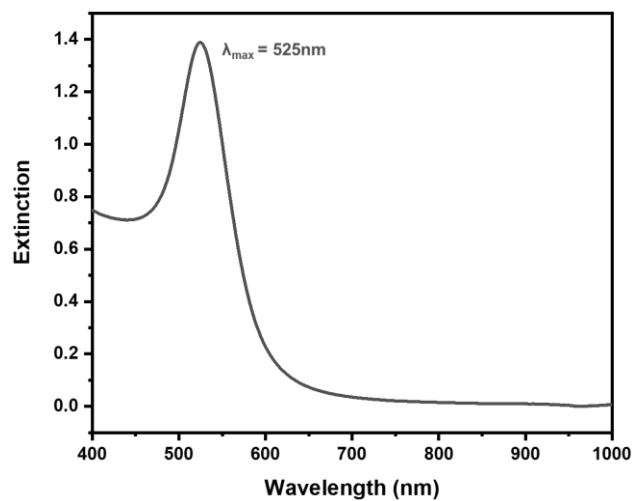

**Figure SI1.** UV-Vis spectrum of citrate capped gold nanoparticles (30 nm).

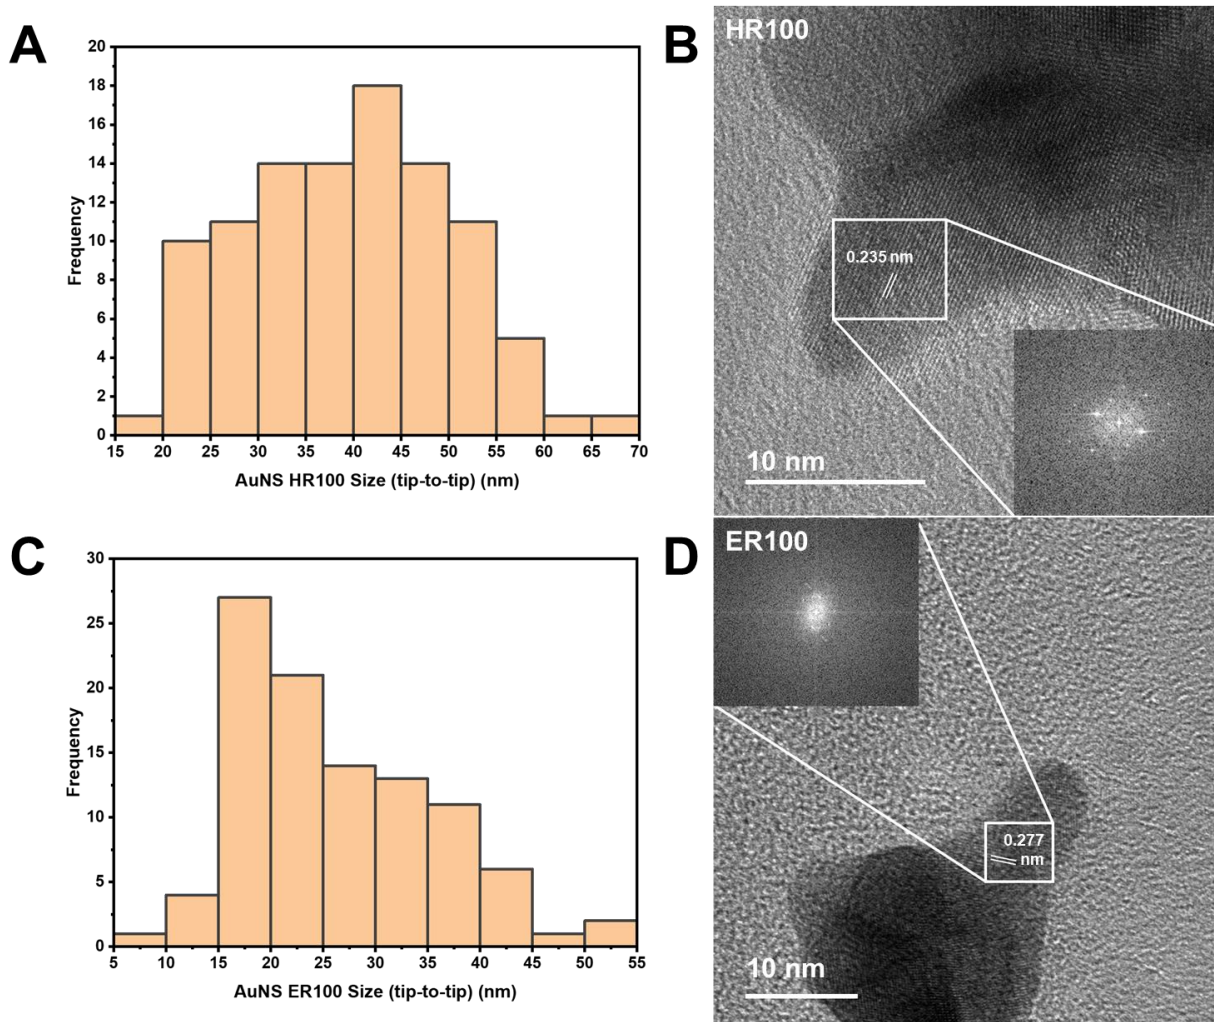

**Figure S12.** Histograms and TEM images of AuNS using HEPES (A and B) and EPPS (C and D) at R 100. The white boxes represent the area where FFT analysis was performed.

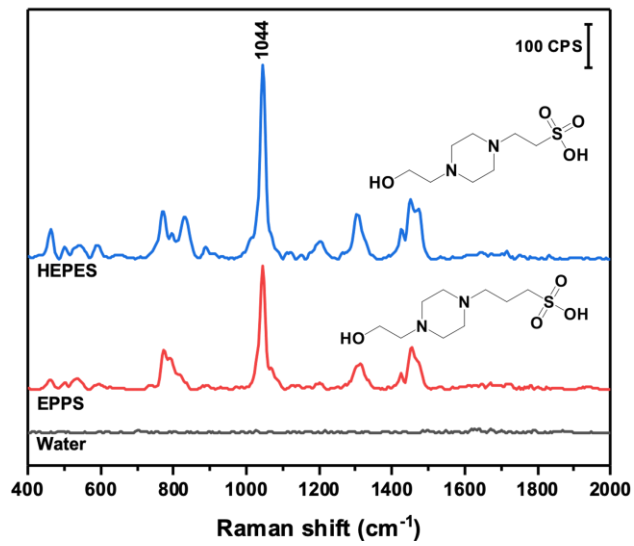

**Figure SI3.** Solution Raman spectra of water, EPPS and HEPES buffer.

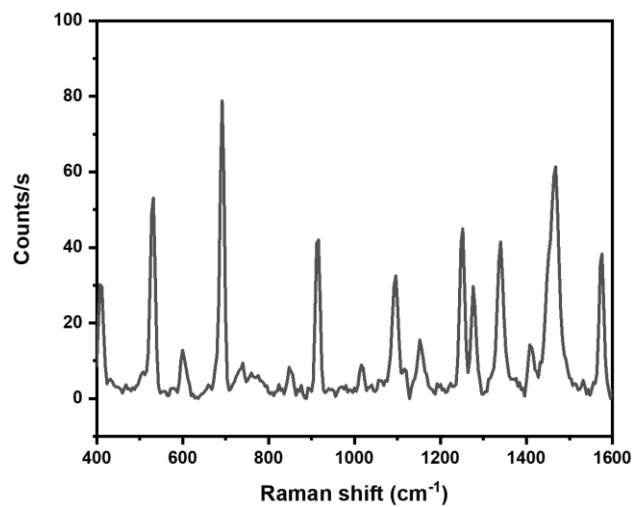

**Figure SI4.** Raman spectrum of solid methimazole.

**Table S11.** Major bands assignments listed for the SERS spectrum of 4-mercaptobenzonitrile on AuNS.

| <b>Band position (cm<sup>-1</sup>)</b> | <b>Assignment<sup>1-3</sup></b>        |
|----------------------------------------|----------------------------------------|
| 1075                                   | C-S and C-C stretching                 |
| 1178                                   | C-H bending and C-C stretch            |
| 1204                                   | C-H bending and C-C≡N stretching modes |
| 1586                                   | C-C stretch                            |
| 2233                                   | C≡N stretch                            |

**Table S12.** Major bands assignments listed for the SERS spectrum of thiabendazole on AuNS.

| <b>Band position (cm<sup>-1</sup>)</b> | <b>Assignment<sup>4</sup></b>      |
|----------------------------------------|------------------------------------|
| 788                                    | C-H out-of-plane bending           |
| 1012                                   | C-H out-of-plane bending           |
| 1276                                   | ring stretching                    |
| 1580                                   | ring stretching and C=N stretching |

**Table SI3.** Major bands assignments listed for the SERS spectrum of methimazole on AuNS.

| <b>Band position (cm<sup>-1</sup>)</b> | <b>Assignment<sup>5-10</sup></b>                                 |
|----------------------------------------|------------------------------------------------------------------|
| 500                                    | S-C-N in plane bending                                           |
| 616                                    | ring out-of-plane bending, ring C-H and N-H out-of-plane bending |
| 1037                                   | ring bending, ring C-H bending and C-S-H bending                 |
| 1086                                   | ring C-N stretching and ring C-H bending                         |
| 1145                                   | C-S stretching, ring C-H bending and C-N stretching              |
| 1320                                   | ring C-N stretching, ring bending and ring C-H bending           |
| 1364                                   | C-N stretching, ring bending and ring C-H bending                |



**Table S14.** Major bands assignments listed for the SERS spectrum of malachite green on AuNS.

| <b>Band position (cm<sup>-1</sup>)</b> | <b>Assignment<sup>11</sup></b> |
|----------------------------------------|--------------------------------|
| 1172                                   | in-plane C-H ring vibration    |
| 1220                                   | C-H rocking                    |
| 1368                                   | N-phenyl stretching vibration  |
| 1592                                   | C-C stretching                 |
| 1616                                   | C-C stretching                 |

**Table S15.** Major bands assignments listed for the SERS spectrum of ciprofloxacin on AuNS.

| <b>Band position (cm<sup>-1</sup>)</b> | <b>Assignment<sup>12, 13</sup></b>  |
|----------------------------------------|-------------------------------------|
| 1392                                   | symmetric O-C-O stretching          |
| 1496                                   | Asymmetric O-C-O stretching         |
| 1544                                   | quinolone ring stretching           |
| 1636                                   | Asymmetric aromatic ring stretching |

## Analyte descriptions

Thiabendazole (TBZ) is a common fungicide applied after harvest to prevent mold and rot on fruit and vegetables.<sup>14</sup> The use of TBZ has been classified as likely to be carcinogenic at high concentrations and poses thyroid hormone production imbalance risks.<sup>15, 16</sup> Since TBZ is widely used in fruits and vegetables ranging from applesauce to sweet potatoes, the maximum residue limit (MRL) will differ per commodity. For example, the United States Environmental Protection Agency (US EPA) has set a tolerance limit of 5 ppm and 10 ppm for applesauce and sweet potatoes, respectively ( $\sim 25\text{-}50\ \mu\text{M}$ ).<sup>17</sup> Figure 6A shows the SERS spectrum of  $5\ \mu\text{M}$  TBZ adsorbed on AuNS before and after the addition of NaCl (200 mM). The major bands are summarized in Table SI2 according to a previously published paper.<sup>4</sup>

Malachite green (MG) is a highly effective fungicide used to mitigate fungi and parasite growth in the aquaculture industry.<sup>18</sup> In Canada, MG is approved for use on aquarium fish only, and is not permitted for use on food-producing animals/fish.<sup>19</sup> MG and its metabolite, leucomalachite green, are known to reside in fish tissue and are known to have mutagenic and teratogenic effects on humans.<sup>18, 19</sup> While its use on aquarium fish is approved, improper disposal or careless treatment of aquarium fish could lead to accidental contamination of surrounding bodies of water and fish. Figure 6C shows the in-solution SERS spectrum of  $0.5\ \mu\text{M}$  MG adsorbed on colloidal AuNS before and after the addition of NaCl. These bands are summarized in Table SI4 according to a previously published paper.<sup>11</sup> MG was used as an example of a fluorescent dye to show the capability of AuNS to detect such a molecule.

Ciprofloxacin (Cipro) is a fluoroquinolone antibiotic used to treat bacterial infections relating to the urinary tract, prostatitis, sinusitis, bones and joints.<sup>20</sup> Figure 6D shows the SERS spectrum of Cipro adsorbed on AuNS before and after the addition of NaCl at a concentration of 5  $\mu$ M. These bands are summarized in Table SI5 according to previously published papers.<sup>12, 13</sup>

## References

1. D. Gkogkou, B. Schreiber, T. Shaykhutdinov, H. K. Ly, U. Kuhlmann, U. Gernert, S. Facsko, P. Hildebrandt, N. Esser, K. Hinrichs, I. M. Weidinger and T. W. H. Oates, *ACS Sens.*, 2016, **1**, 318-323.
2. R. Holze, *J. Solid State Electrochem.*, 2013, **17**, 1869-1879.
3. E. Villarreal, G. G. Li, Q. Zhang, X. Fu and H. Wang, *Nano Lett.*, 2017, **17**, 4443-4452.
4. M. S. Kim, M. K. Kim, C. J. Lee, Y. M. Jung and M.-S. Lee, *Bull. Korean Chem. Soc.*, 2009, **30**, 2930-2934.
5. J. Fei, L. Wu, Y. Zhang, S. Zong, Z. Wang and Y. Cui, *ACS Sens.*, 2017, **2**, 773-780.
6. P. Ma, F. Liang, Q. Yang, D. Wang, Y. Sun, X. Wang, D. Gao and D. Song, *Microchim. Acta*, 2014, **181**, 975-981.
7. M. Muniz-Miranda, F. Muniz-Miranda and A. Pedone, *PCCP*, 2016, **18**, 5974-5980.
8. T. A. Saleh, M. M. Al-Shalalfeh and A. A. Al-Saadi, *Sci. Rep.*, 2016, **6**, 32185.
9. T. A. Saleh, M. M. Al-Shalalfeh and A. A. Al-Saadi, *Mater. Res. Bull.*, 2017, **91**, 173-178.
10. T. A. Saleh, M. M. Al-Shalalfeh, A. T. Onawole and A. A. Al-Saadi, *Vib. Spectrosc.*, 2017, **90**, 96-103.
11. N. Chamuah, N. Bhuyan, P. P. Das, N. Ojah, A. J. Choudhary, T. Medhi and P. Nath, *Sens. Actuators, B*, 2018, **273**, 710-717.
12. U. Neugebauer, A. Szeghalmi, M. Schmitt, W. Kiefer, J. Popp and U. Holzgrabe, *Spectrochim. Acta, Part A*, 2005, **61**, 1505-1517.
13. L. Yang, X. Qin, X. Jiang, M. Gong, D. Yin, Y. Zhang and B. Zhao, *PCCP*, 2015, **17**, 17809-17815.
14. F. K. Alsammarraie, M. Lin, A. Mustapha, H. Lin, X. Chen, Y. Chen, H. Wang and M. Huang, *Food Chem.*, 2018, **259**, 219-225.
15. P. Liou, F. X. Nayigiziki, F. Kong, A. Mustapha and M. Lin, *Carbohydr. Polym.*, 2017, **157**, 643-650.
16. USEPA, EPA reregistration eligibility decision thiabendazole, [https://archive.epa.gov/pesticides/reregistration/web/pdf/thiabendazole\\_red.pdf](https://archive.epa.gov/pesticides/reregistration/web/pdf/thiabendazole_red.pdf), (accessed March 31, 2019).
17. USDA, Pesticide Data Program Annual Summary, Calendar Year 2017, <https://www.ams.usda.gov/sites/default/files/media/2017PDPAnnualSummary.pdf>, (accessed March 31, 2019).
18. Y. Zhao, Y. Tian, P. Ma, A. Yu, H. Zhang and Y. Chen, *Anal. Methods*, 2015, **7**, 8116-8122.
19. CFIA, Malachite Green - Questions and Answers, <http://www.inspection.gc.ca/food/information-for-consumers/fact-sheets-and-infographics/products-and-risks/chemical-hazards/malachite-green/eng/1332268890141/1332268947157>, (accessed April 2, 2019).
20. I. J. Hidi, J. Heidler, K. Weber, D. Cialla-May and J. Popp, *Anal. Bioanal. Chem.*, 2016, **408**, 8393-8401.
